# Supplementary material for: Inlay of Bi2O2CO3 nanoparticles onto Bi2WO6 nanosheets to build heterostructured photocatalysts
Source: Royal Society of Chemistry journal article supplement (doi:10.1039/c3dt53325e), 2013-12-12
Supplement: c3dt53325e.pdf [file c3dt53325e.pdf]

***Electronic Supplementary Information***

**Inlay of  $\text{Bi}_2\text{O}_2\text{CO}_3$  nanoparticles onto  $\text{Bi}_2\text{WO}_6$  nanosheets to  
build heterostructured photocatalysts**

Yang-Sen Xu, Ze-Jun Zhang, Wei-De Zhang<sup>\*</sup>

School of Chemistry and Chemical Engineering, South China University of  
Technology, 381 Wushan Road, Guangzhou 510640, People's Republic of China

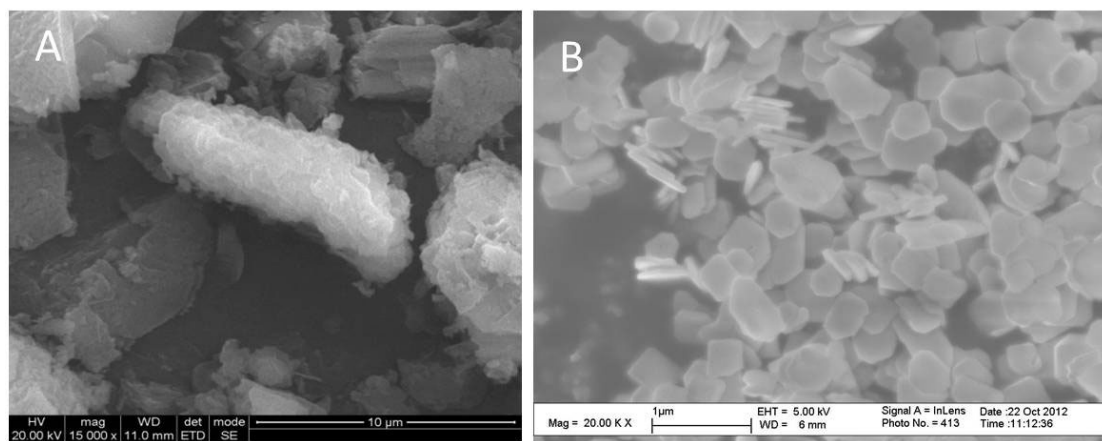

Fig. S1 SEM images of g-C<sub>3</sub>N<sub>4</sub> (A) and Bi<sub>2</sub>O<sub>2</sub>CO<sub>3</sub> (B).

<sup>\*</sup> Corresponding author. Tel and Fax: 86-20-8711 4099, E-mail address: [zhangwd@scut.edu.cn](mailto:zhangwd@scut.edu.cn) (W. D. Zhang).

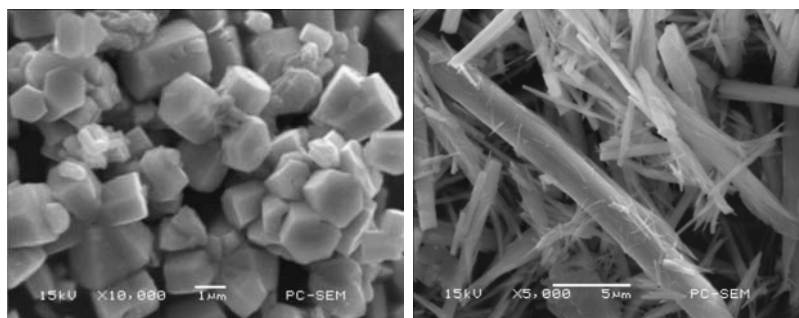

Fig. S2 SEM images of the ZnO samples obtained with g-C<sub>3</sub>N<sub>4</sub> as a source of NH<sub>4</sub><sup>+</sup> via hydrothermal process.

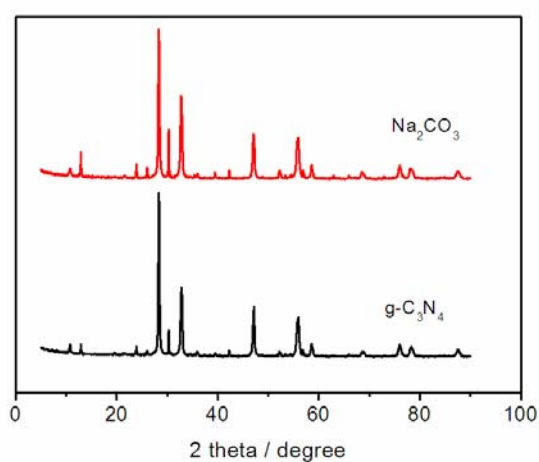

Fig. S3 XRD patterns of the Bi<sub>2</sub>O<sub>2</sub>CO<sub>3</sub>/Bi<sub>2</sub>WO<sub>6</sub> nanocomposites prepared using g-C<sub>3</sub>N<sub>4</sub> or Na<sub>2</sub>CO<sub>3</sub> as a source of CO<sub>3</sub><sup>2-</sup>.

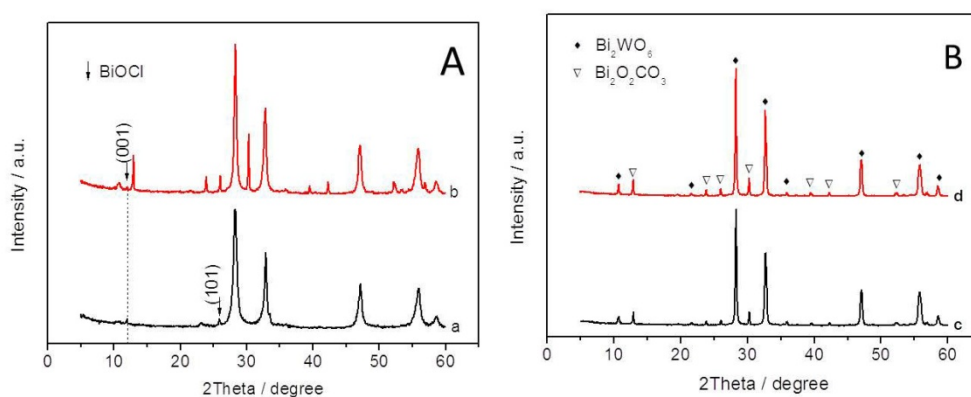

Fig. S4 XRD patterns of the samples prepared with different volume of NaOH, (a) 5.0 mL, (b) 6.0 mL, (c) 7.0 mL, and (d) 8.0 mL.

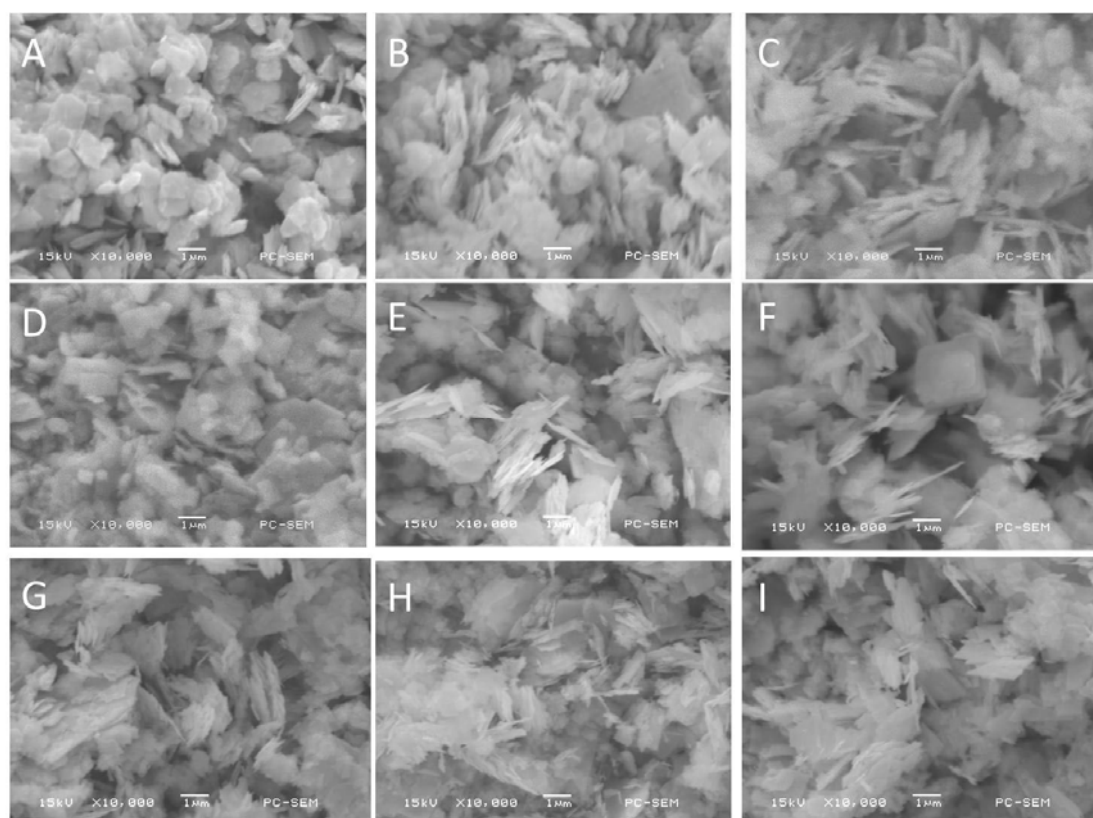

Fig. S5 SEM images of the samples prepared with different volume of NaOH, (A) 5.0 mL, (B) 6.0 mL, (C) 7.0 mL, (D) 8.0 mL, (E) 6.4 mL, (F) 6.5 mL, (G) 6.6 mL, (H) 6.7 mL, and (I) 6.8 mL.

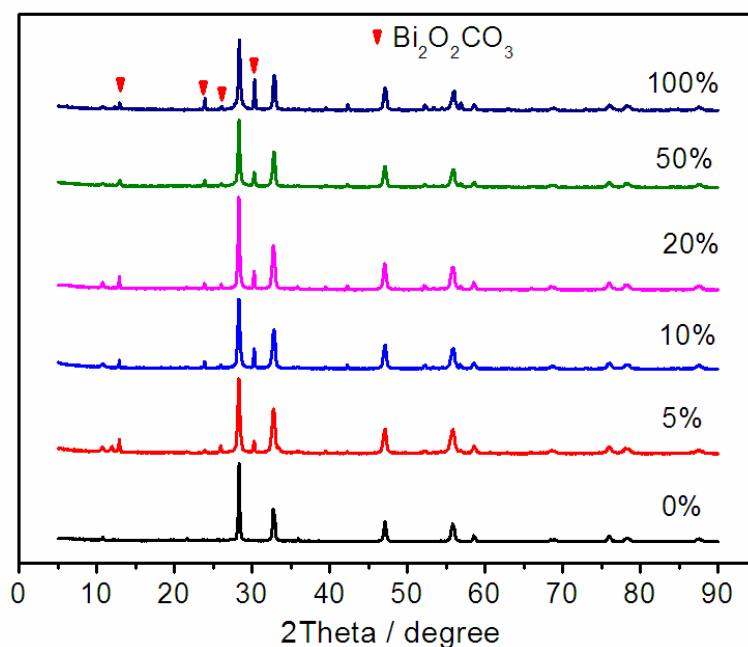

Fig. S6 XRD patterns of the  $\text{Bi}_2\text{O}_2\text{CO}_3/\text{Bi}_2\text{WO}_6$  composites prepared using different amounts of  $\text{g-C}_3\text{N}_4$ .

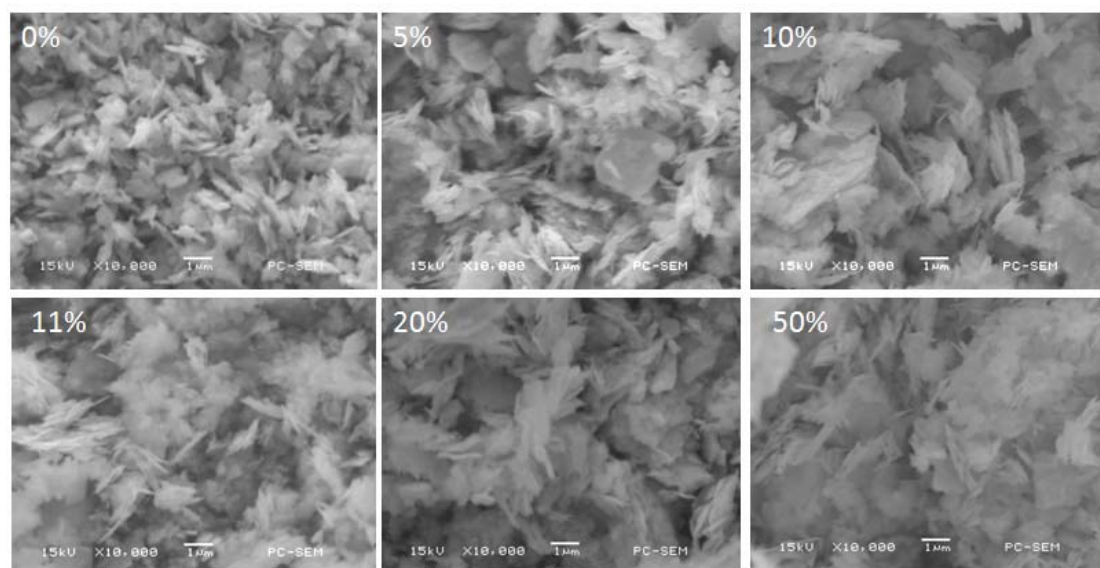

Fig. S7 SEM images of the  $\text{Bi}_2\text{O}_2\text{CO}_3/\text{Bi}_2\text{WO}_6$  composites prepared using different amounts of  $\text{g-C}_3\text{N}_4$ .

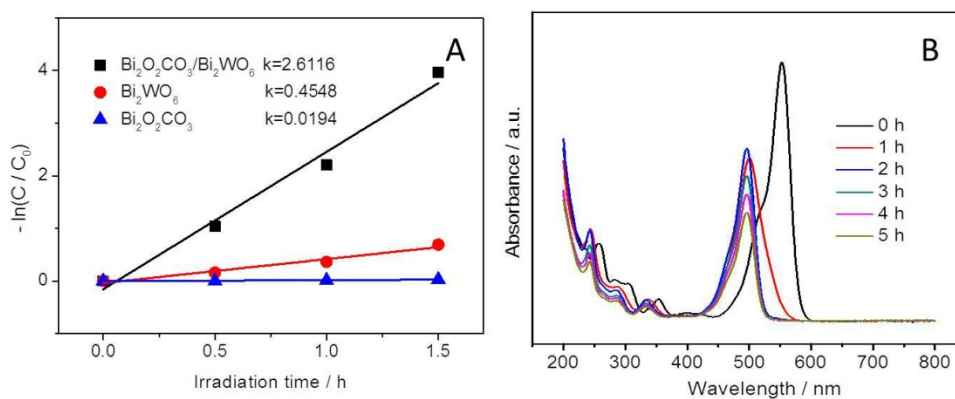

Fig. S8 (A) Plots of degradation rate of RhB over  $\text{Bi}_2\text{O}_2\text{CO}_3$ ,  $\text{Bi}_2\text{WO}_6$  and  $\text{Bi}_2\text{O}_2\text{CO}_3/\text{Bi}_2\text{WO}_6$  under visible light irradiation ( $k$  is the apparent rate constant,  $\text{h}^{-1}$ ).  
(B) Absorption spectra change of the RhB solution during the photocatalytic reaction.

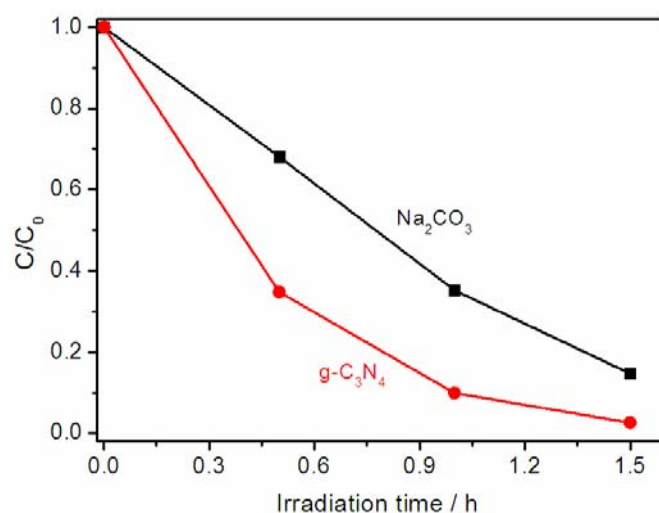

Fig. S9 Plots of degradation of RhB over  $\text{Bi}_2\text{O}_2\text{CO}_3/\text{Bi}_2\text{WO}_6$  obtained using  $\text{Na}_2\text{CO}_3$  or  $\text{g-C}_3\text{N}_4$  as the source of  $\text{CO}_3^{2-}$  under visible light irradiation. In the direct hydrothermal process, the molar ratio of the starting materials is 1:0.5:0.04 ( $\text{Bi}(\text{NO}_3)_3 \cdot 5\text{H}_2\text{O}$ :  $\text{Na}_2\text{WO}_4 \cdot 2\text{H}_2\text{O}$ :  $\text{Na}_2\text{CO}_3$ ).

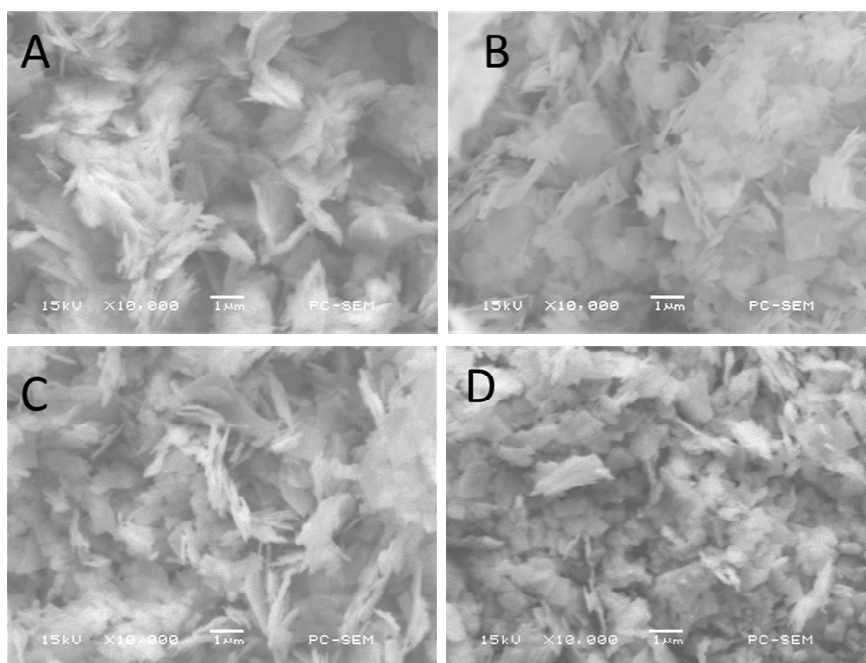

Fig. S10 SEM images of the  $\text{Bi}_2\text{O}_2\text{CO}_3/\text{Bi}_2\text{WO}_6$  composites attained after reaction for (A) 8 h, (B) 12 h, (C) 16 h, and (D) 20 h.

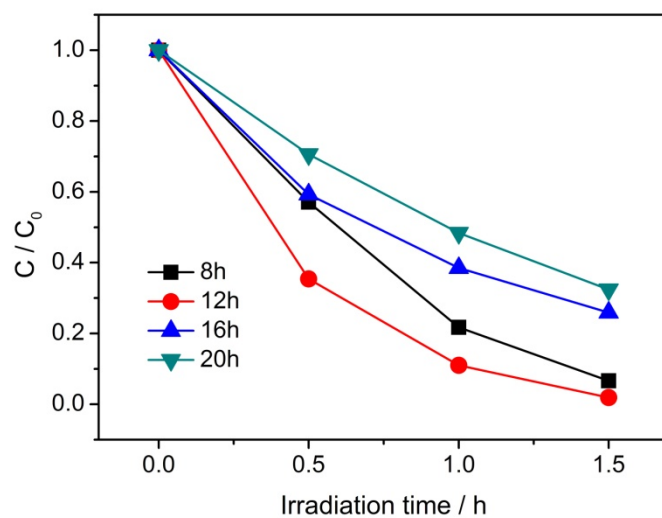

Fig. S11 Comparison of photocatalytic activity of the  $\text{Bi}_2\text{O}_2\text{CO}_3/\text{Bi}_2\text{WO}_6$  composites attained after reaction for (A) 8 h, (B) 12 h, (C) 16 h, and (D) 20 h towards the degradation of RhB under visible light irradiation.

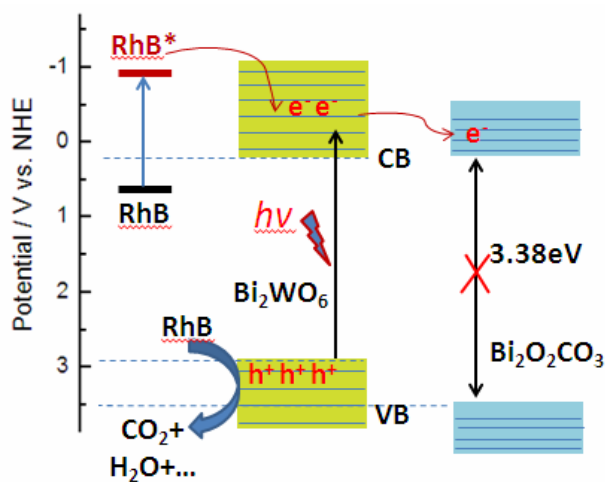

Fig. S12 Schematic diagram for the energy band structure of the  $\text{Bi}_2\text{O}_2\text{CO}_3/\text{Bi}_2\text{WO}_6$  and the possible charge transfer process under visible light irradiation.

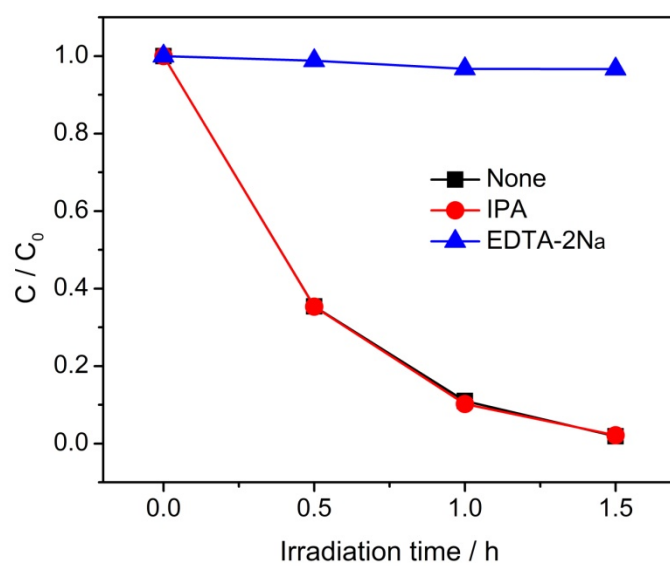

Fig. S13 Plots of Photogenerated carries trapping in the system of photocatalytic degradation of RhB over  $\text{Bi}_2\text{O}_2\text{CO}_3/\text{Bi}_2\text{WO}_6$  under visible light irradiation.
